# Supplementary material for: Phytic Acid Treatment Inhibits Browning and Lignification to Promote the Quality of Fresh-Cut Apples during Storage
Source: MDPI journal article supplement (doi:10.3390/foods11101470), 2022-05-18
Supplement: s1 [file s1]

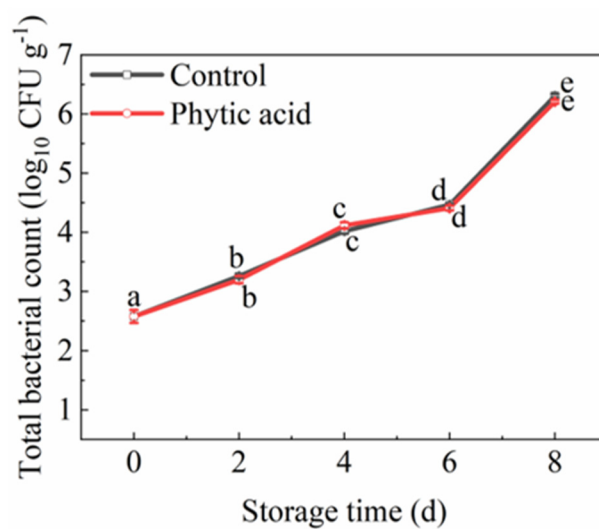

**Supplementary Figure S1.** The total bacterial count of fresh-cut apples during storage after treatment with phytic acid or the control. Vertical bars represent standard errors of the means of three replicates. The different letters indicate significant differences at  $p < 0.05$ .

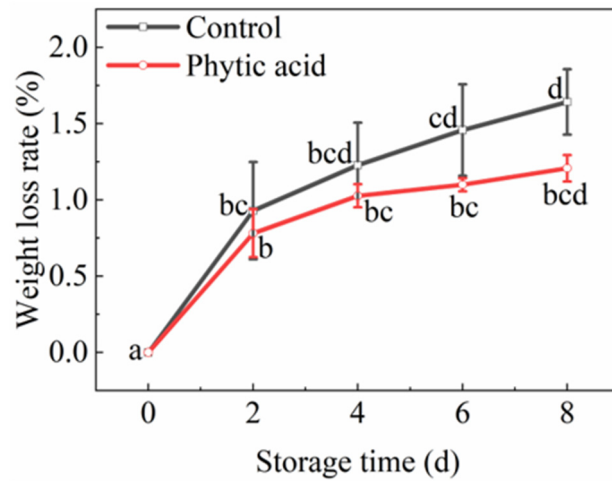

**Supplementary Figure S2.** The water loss rate of fresh-cut apples during storage after treatment with phytic acid or the control. Vertical bars represent standard errors of the means of three replicates. The different letters indicate significant differences at  $p < 0.05$ .
